# Supplementary material for: Fructus Amomi extract attenuates nasal inflammation by restoring Th1/Th2 balance and down-regulation of NF-κB phosphorylation in OVA-induced allergic rhinitis
Source: Oxford University Press journal article supplement (doi:10.1042/bsr20212681), 2022-03-01
Supplement: bsr-2021-2681_supp.pdf [file bsr-2021-2681_supp.pdf]

Supplementary material for

***Fructus Amomi* extract attenuates nasal inflammation by restoring Th1/Th2 balance via the downregulation of NF- $\kappa$ B phosphorylation and mast cell activation in OVA-induced allergic rhinitis**

Yanjing Fan<sup>a,†</sup>, Thi Van Nguyen<sup>a,†</sup>, Chun Hua Piao<sup>a,b</sup>, Hee Soon Shin<sup>c,d</sup>, Chang Ho Song<sup>a,e\*</sup>, Ok Hee Chai<sup>a,e\*</sup>

<sup>a</sup>Department of Anatomy, Jeonbuk National University Medical School, Jeonju, Jeonbuk, 54896, Republic of Korea.

<sup>b</sup>Department of Pulmonary and Critical Care Medicine, Yantai Yuhuangding Hospital, Yantai 264000, China.

<sup>c</sup>Division of Food Functionality Research, Korea Food Research Institute, 245 Nongsaengmyeong-ro, Iseo-myeon, Wanju-gun, Jeollabuk-do, 55365, Republic of Korea.

<sup>d</sup>Food Biotechnology Program, Korea University of Science and Technology, Daejeon, 305-350, Republic of Korea.

<sup>e</sup>Institute for Medical Sciences, Jeonbuk National University, Jeonju, Jeonbuk, 54896, Republic of Korea.

† These authors equally contributed in this work.

**A**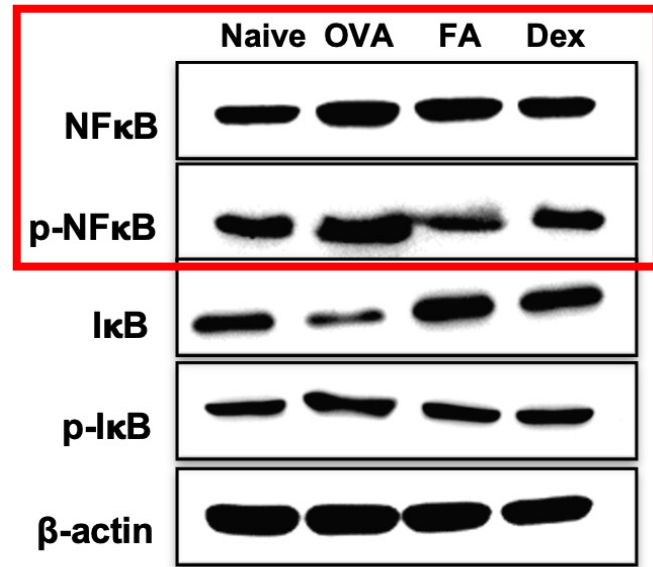**B**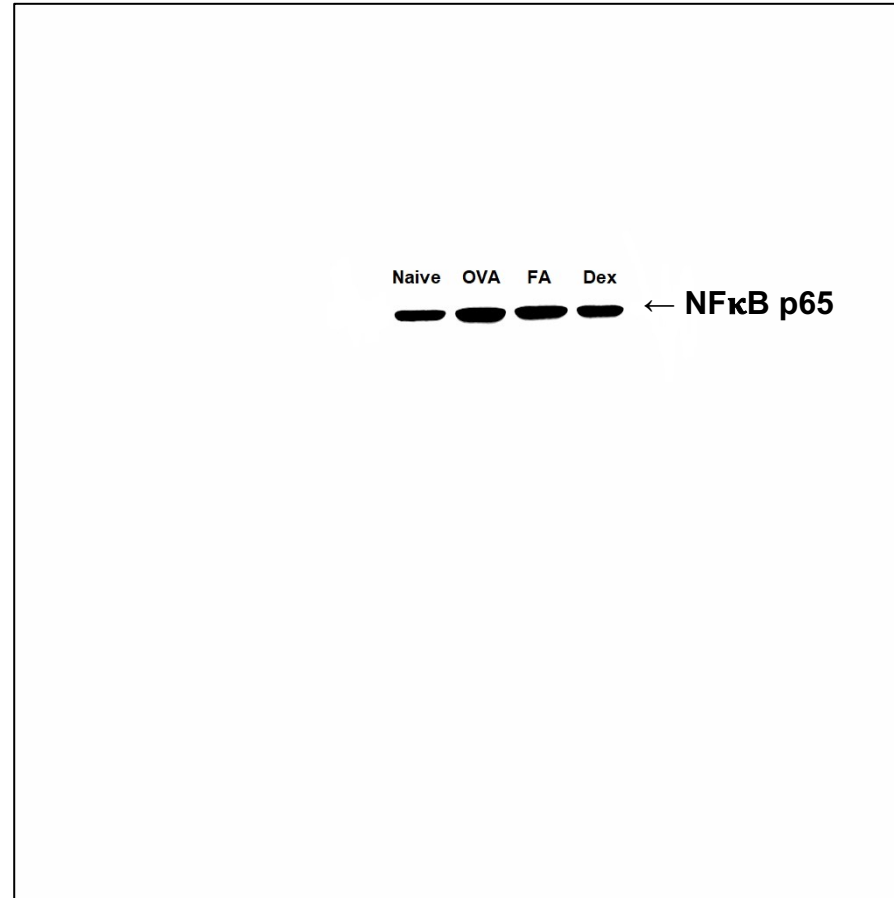**C**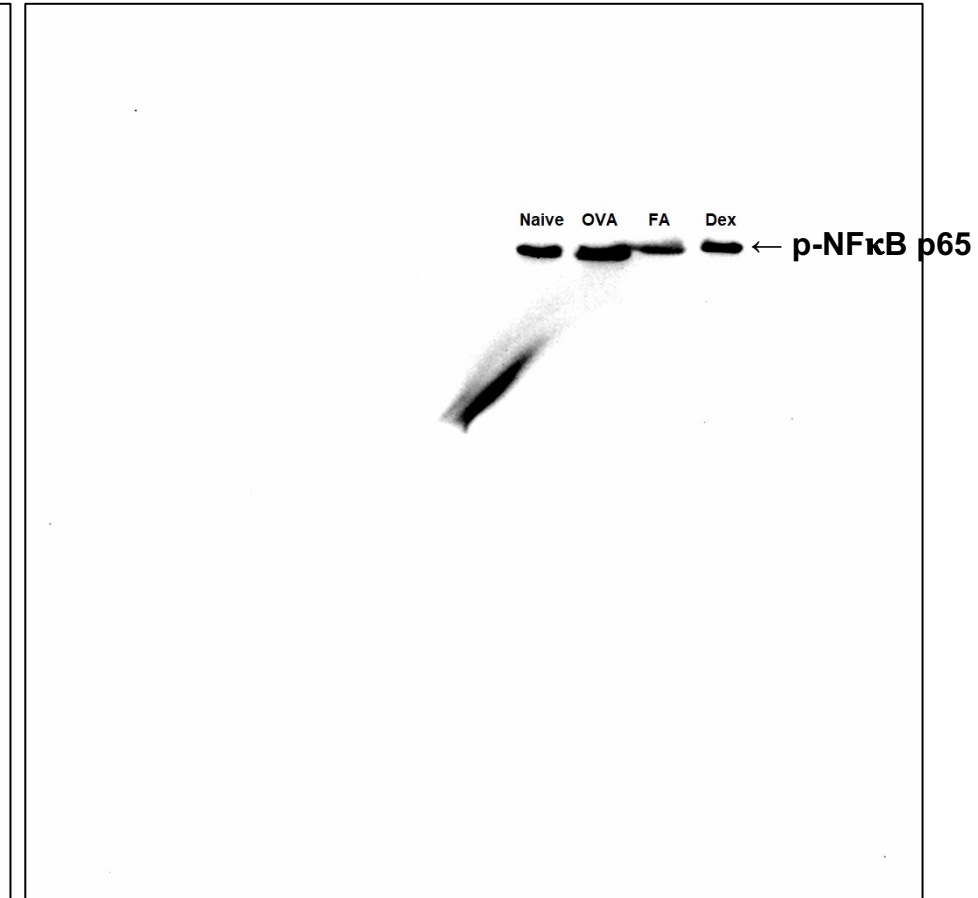

**Figure S1. Full length gels and blots of NF $\kappa$ B signaling related proteins in lung tissues**  
(A) Western blot data. Original Western blot picture of (B) NF $\kappa$ B p65 and (C) p-NF $\kappa$ B p65. Membrane C was stripped from membrane B.

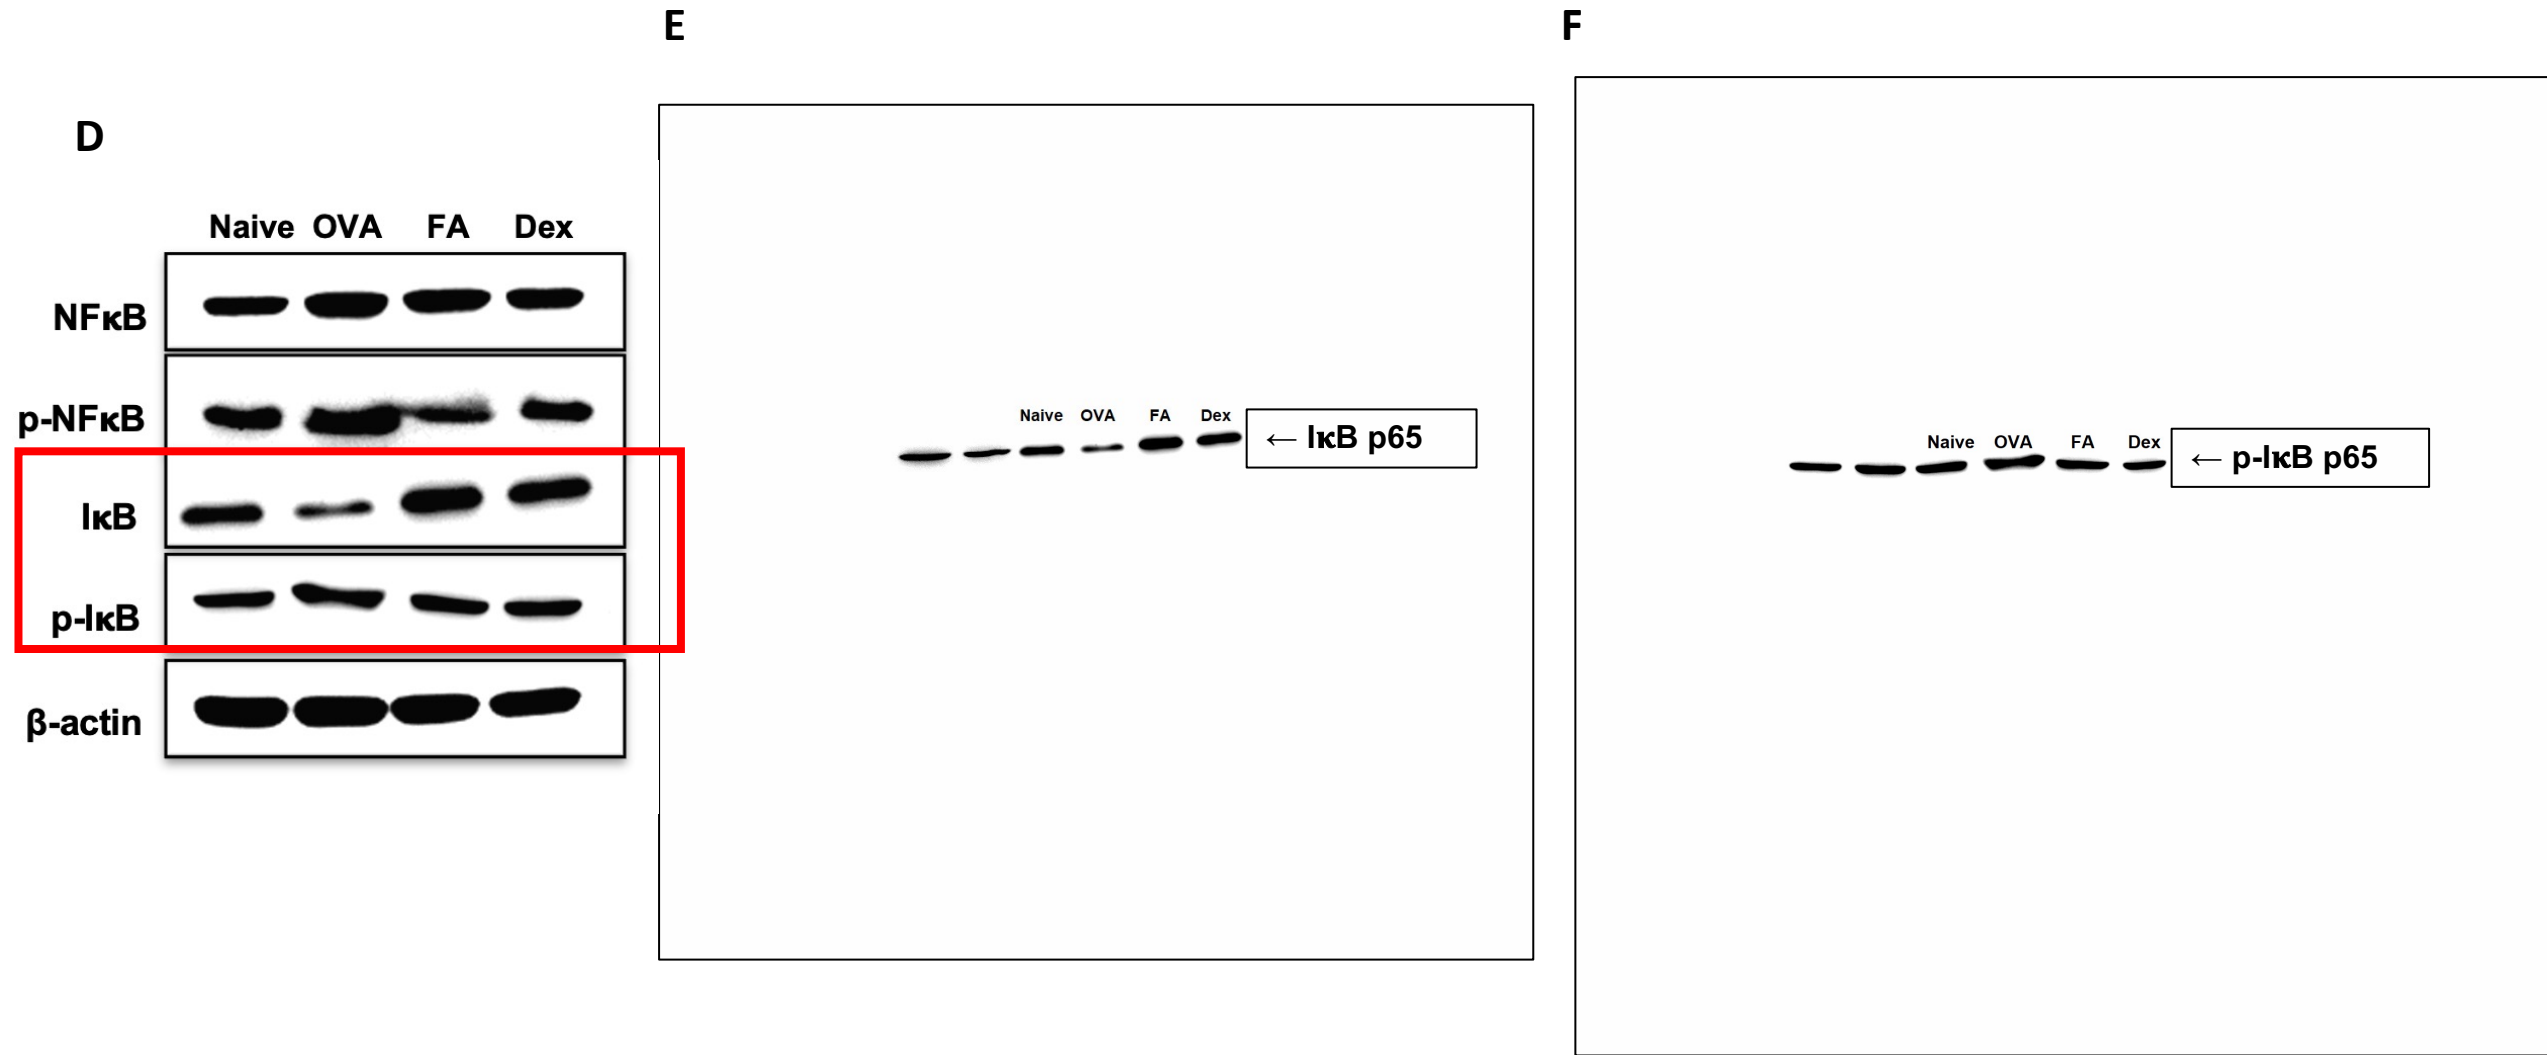

**Figure S1. Full length gels and blots of NF $\kappa$ B signaling related proteins in lung tissues**  
(D) Western blot data. Original Western blot picture of (E) I $\kappa$ B and (C) p-I $\kappa$ B. Membrane E was stripped from membrane F.

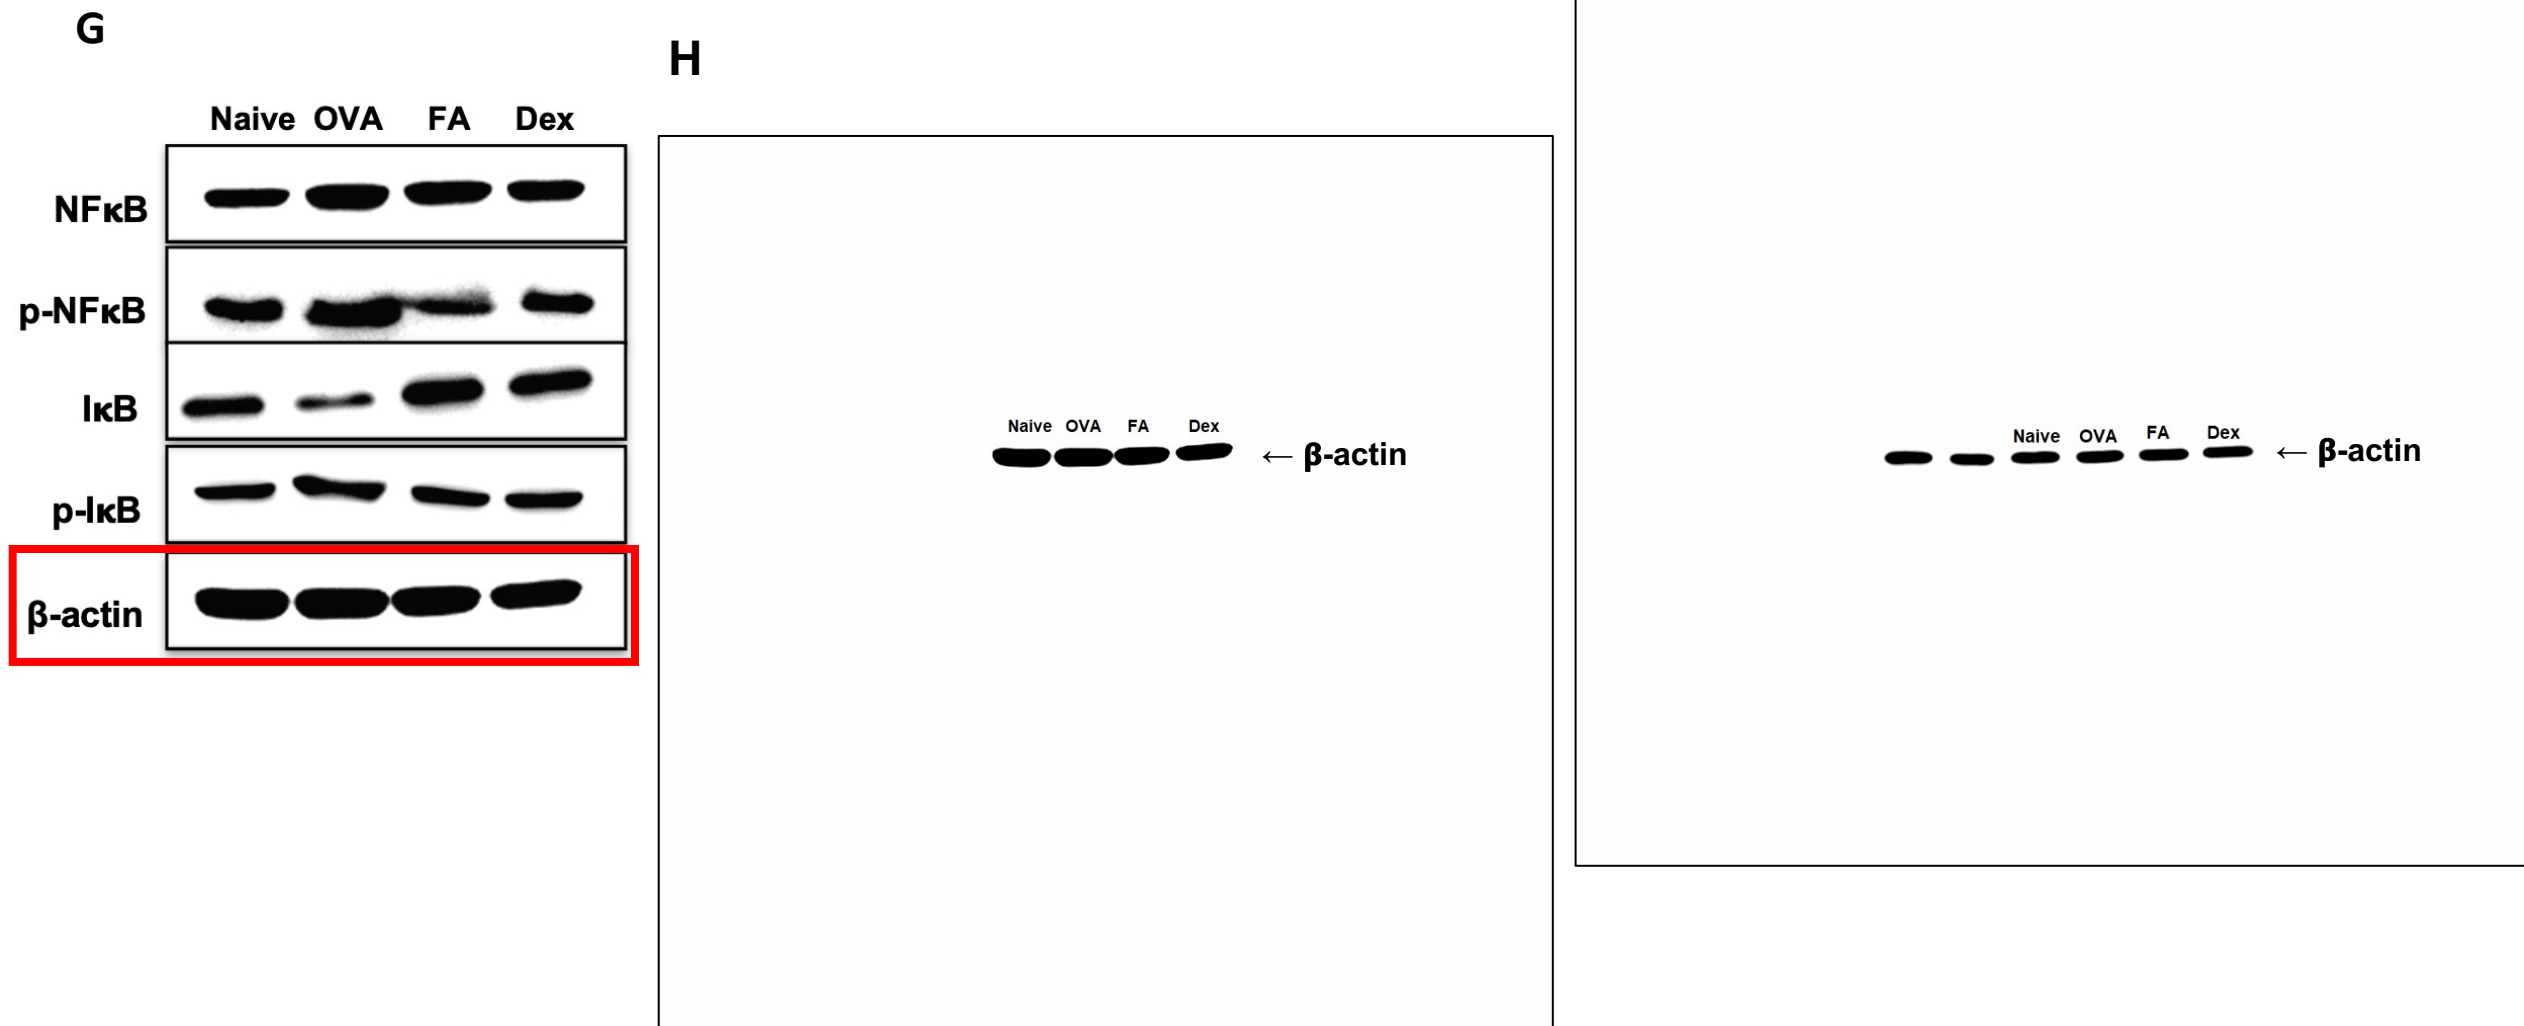

**Figure S1. Full length gels and blots of NFκB signaling related proteins in lung tissues**  
 (A) Western blot data. Original Western blot picture of (H), (I) β-actin. Membrane H was stripped from membrane A. Membrane I was stripped from membrane F.

**A**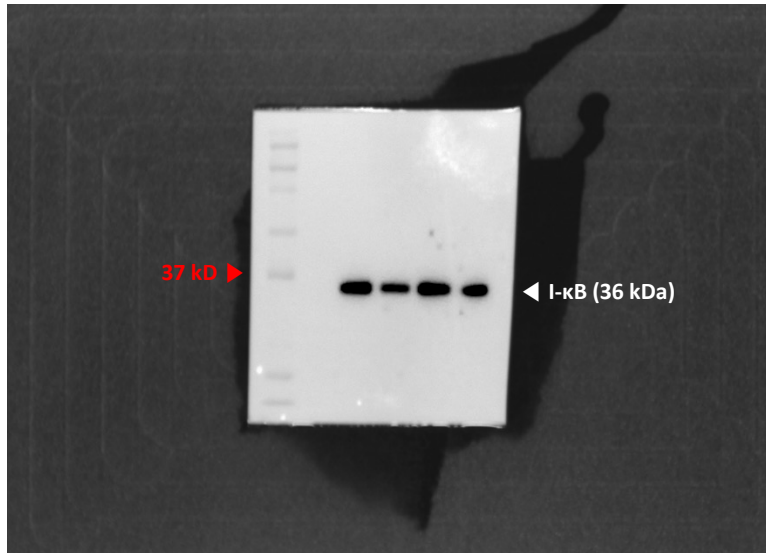**B**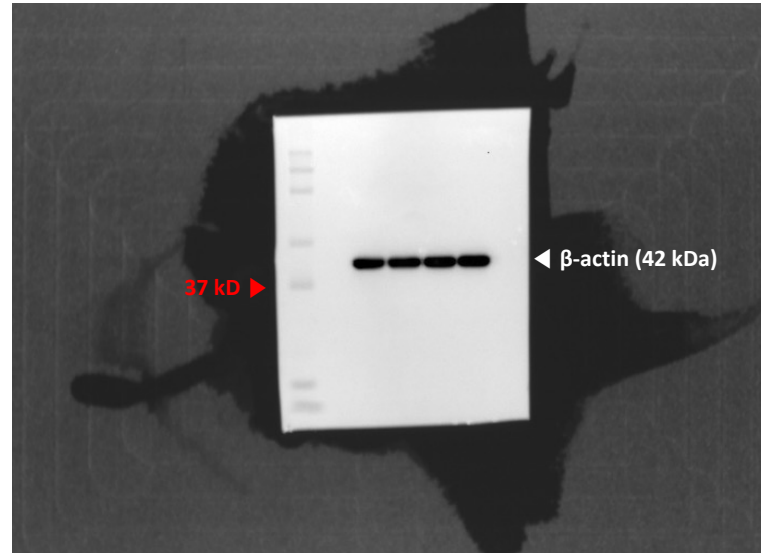**C**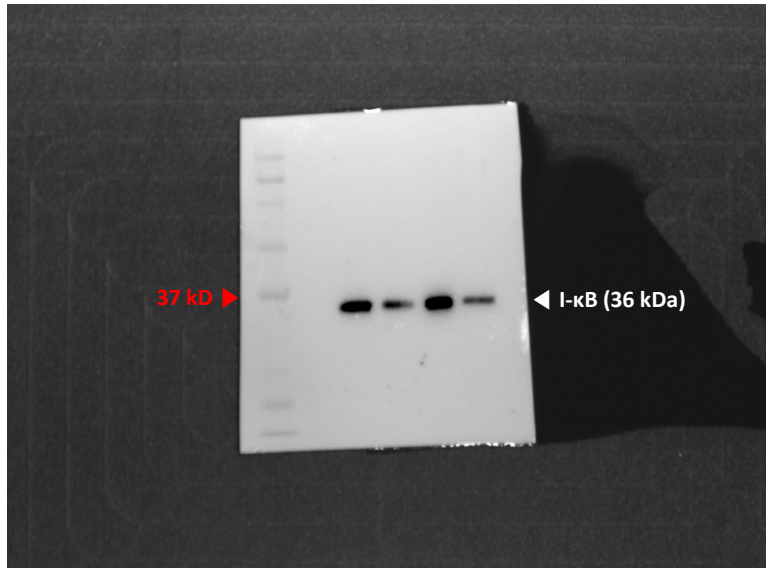**D**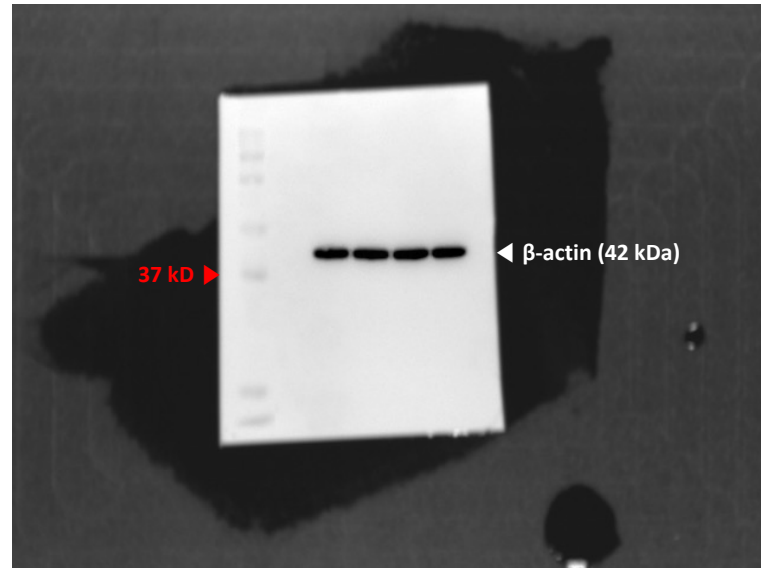

**Figure S2. Full length gels and blots of I-κB proteins in lung tissues (repeated experiment)**

Original Western blot picture of (A), (C) I-κB; (B), (D) β-actin. Membrane B was stripped from membrane A. Membrane D was stripped from membrane C.

**A**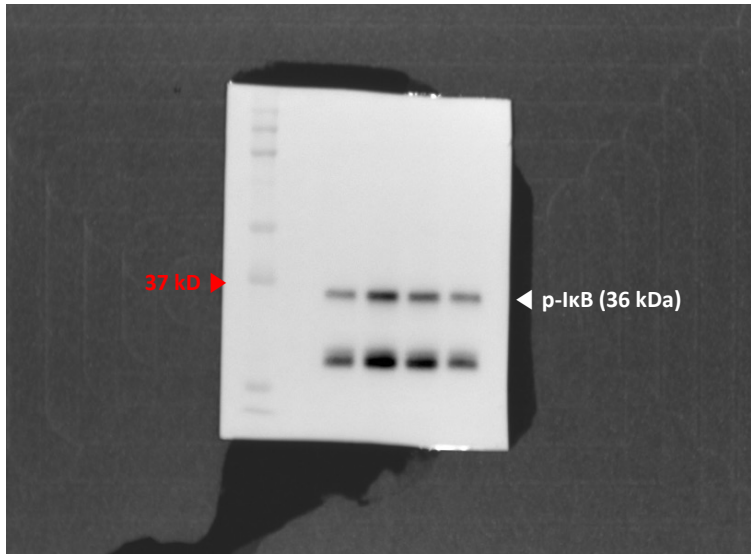**B**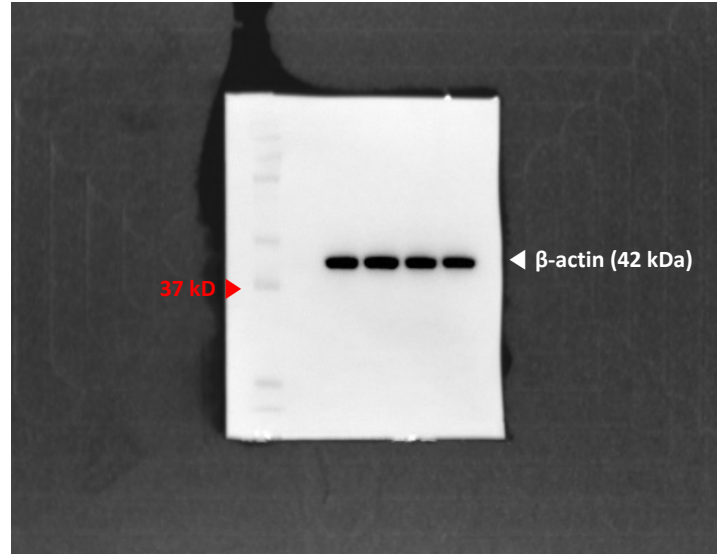**C**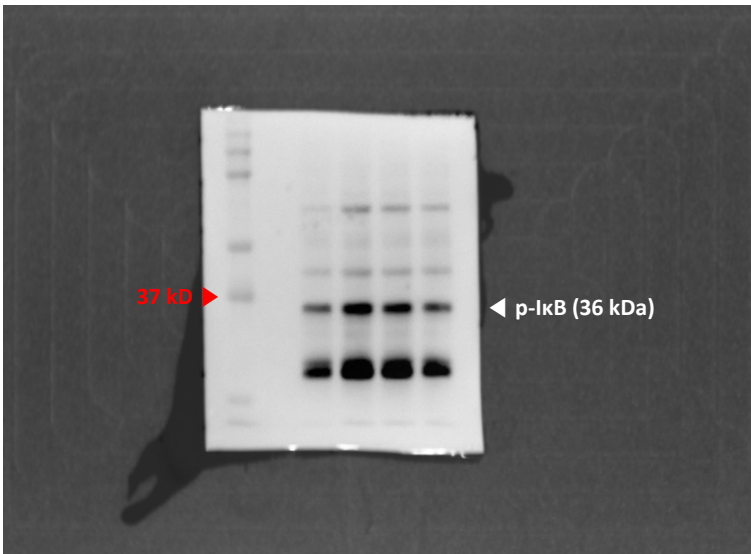**D**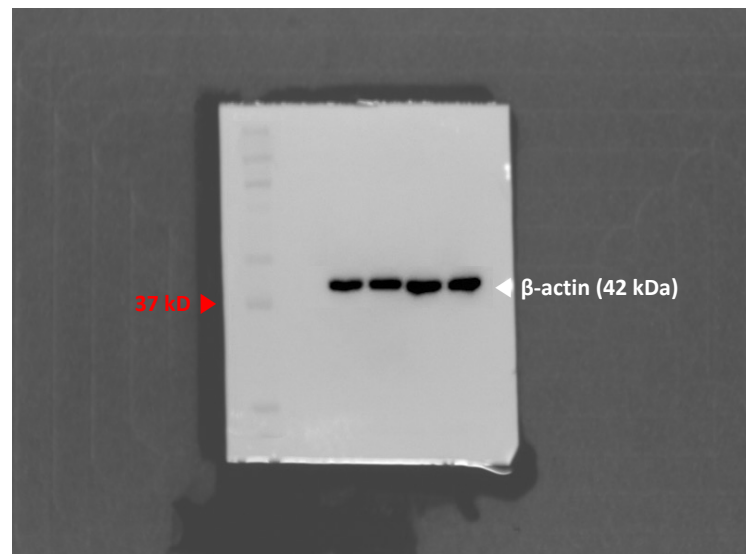

**Figure S3. Full length gels and blots of p-IκB proteins in lung tissues (repeated experiment)**

Original Western blot picture of (A), (C) p-IκB; (B), (D) β-actin. Membrane B was stripped from membrane A. Membrane D was stripped from membrane C.

**A**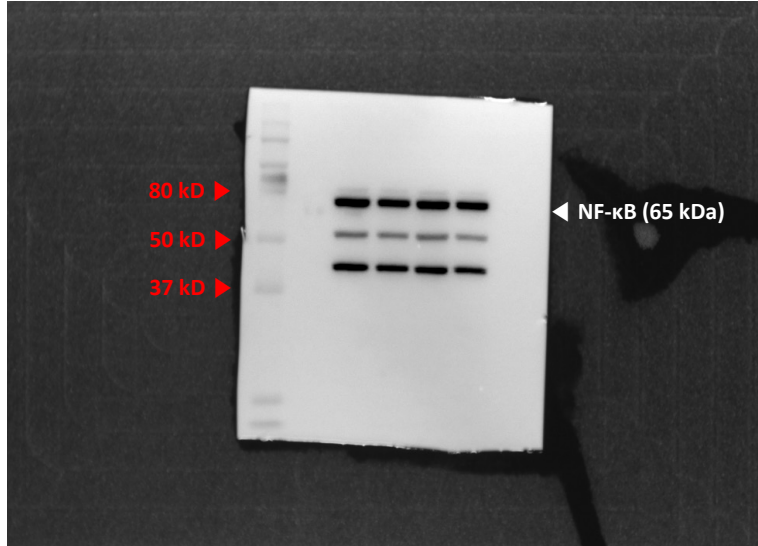**B**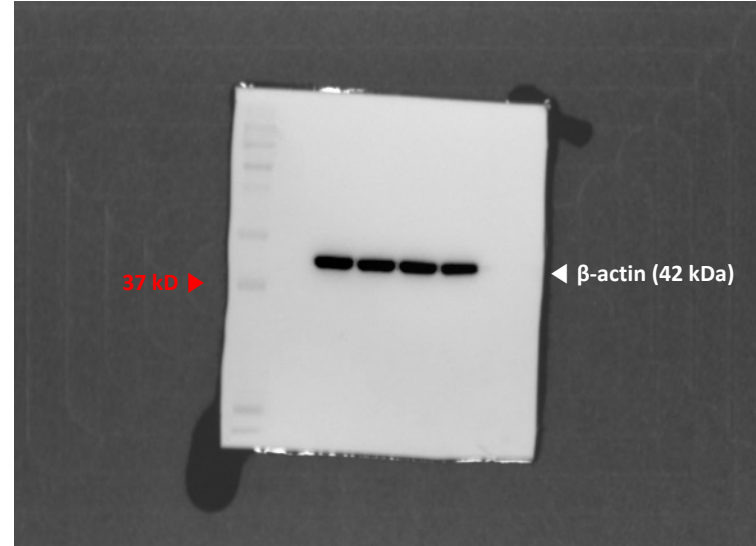**C**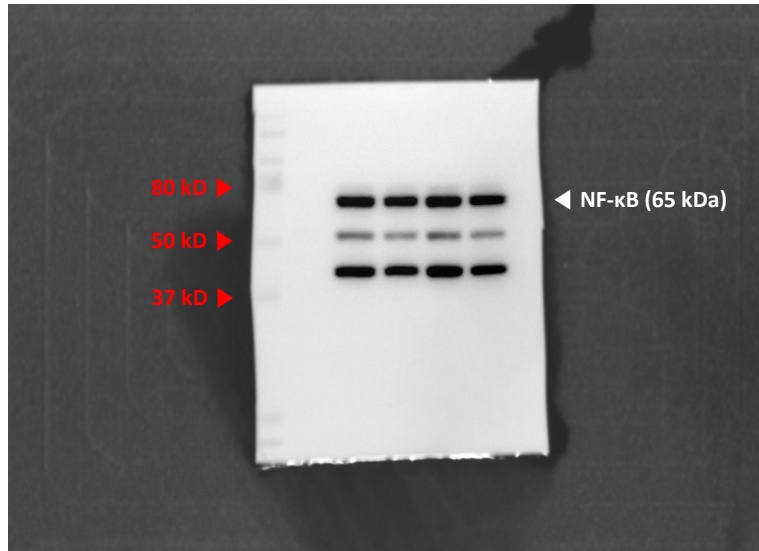**D**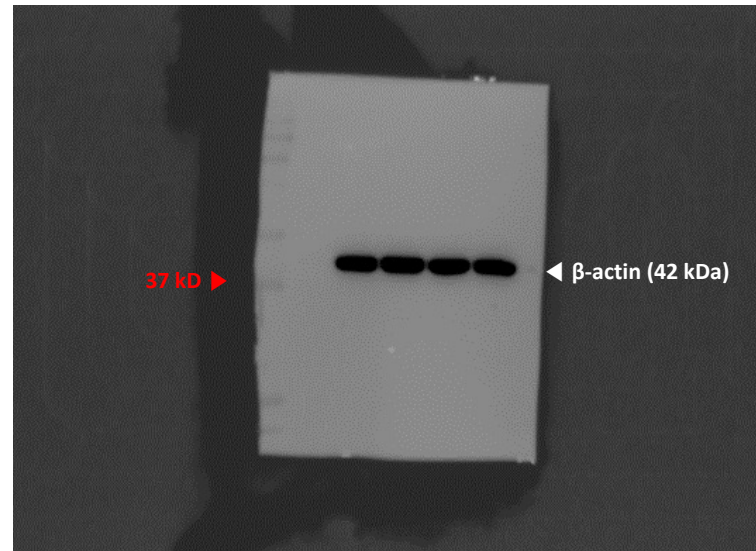

**Figure S4. Full length gels and blots of NF-κB proteins in lung tissues (repeated experiment)**

Original Western blot picture of (A), (C) NF-κB; (B), (D) β-actin. Membrane B was stripped from membrane A. Membrane D was stripped from membrane C.



**A**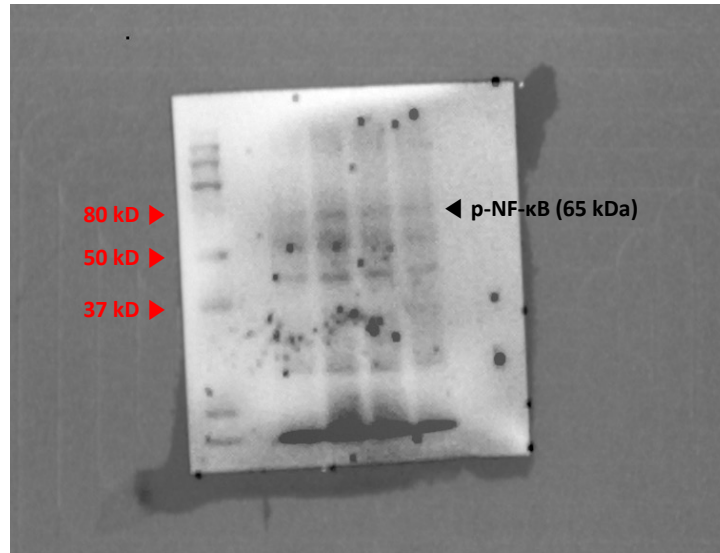**B**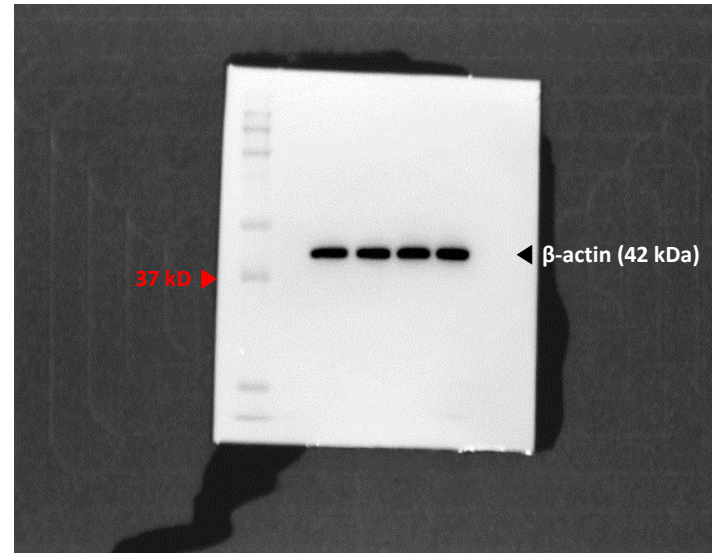**C**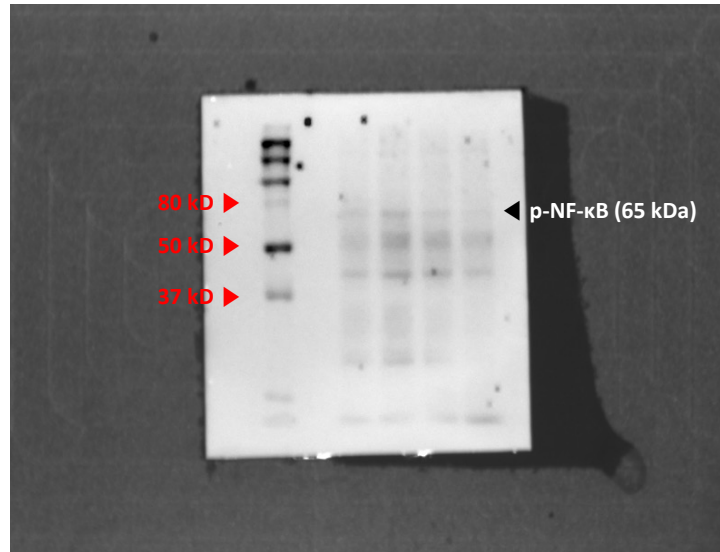**D**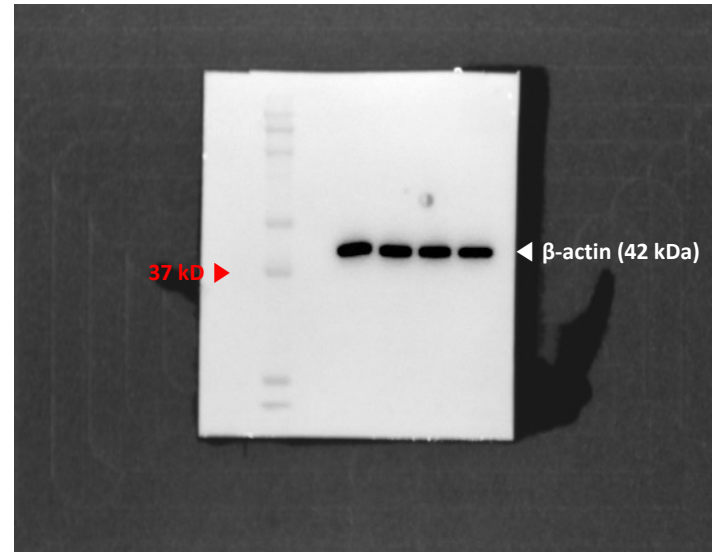

**Figure S5. Full length gels and blots of p-NF-κB proteins in lung tissues (repeated experiment)**

Original Western blot picture of (A), (C) p-NF-κB; (B), (D) β-actin.

Membrane B was stripped from membrane A. Membrane D was stripped from membrane C.
